# Supplementary material
Source: publisher figshare collection journal article supplement (https://tandf.figshare.com/ndownloader/files/37563737)
Supplement: Supplementary file 1 [file 37563737]

Additional file 3

**Figures S1-S5**


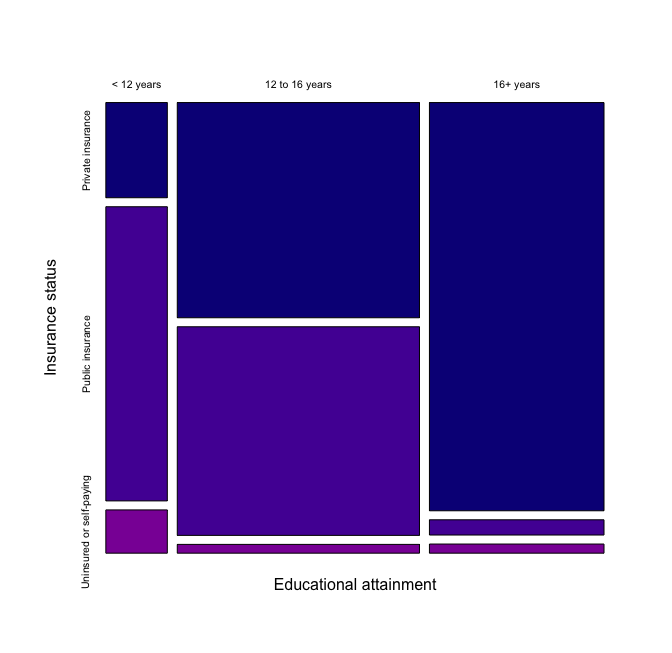

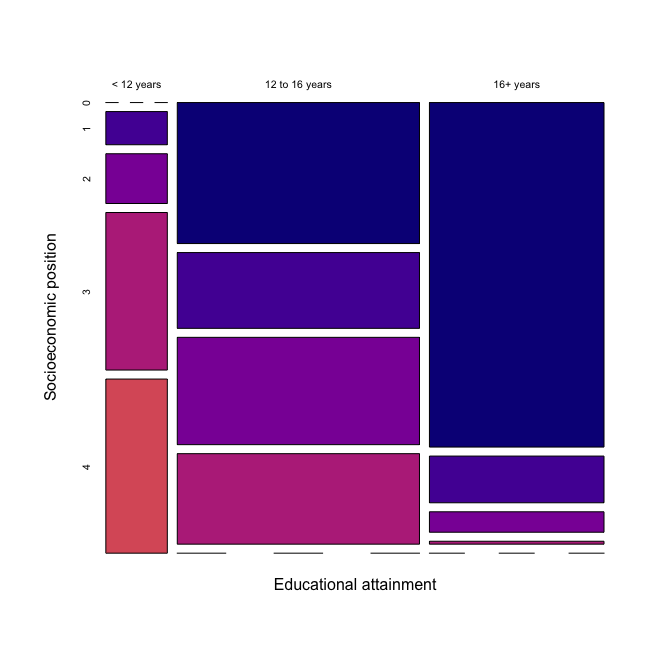


**B**

**A**

**Figure S1. Bivariate relationship between (A) insurance status and educational attainment and (B) socioeconomic position and educational attainment.**


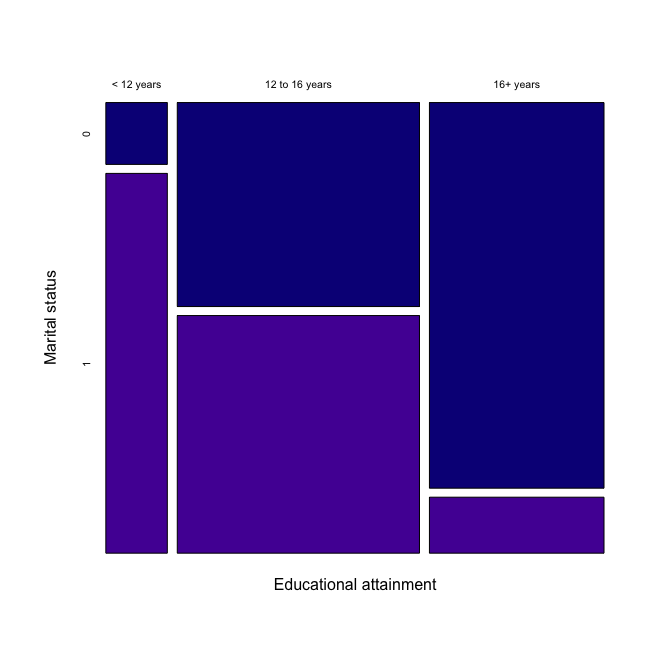

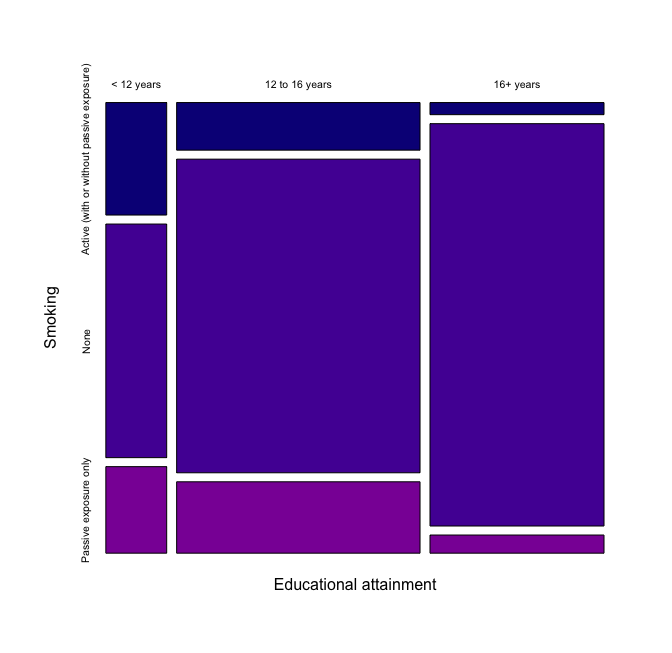


**A**

**Figure S2. Bivariate relationship between (A) marital status and educational attainment and (B) smoking status during pregnancy and educational attainment.**

**B**


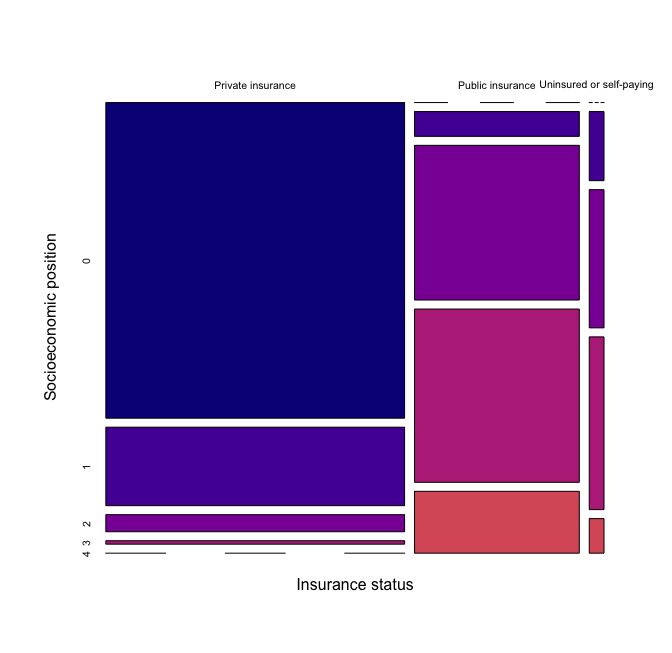


**A**


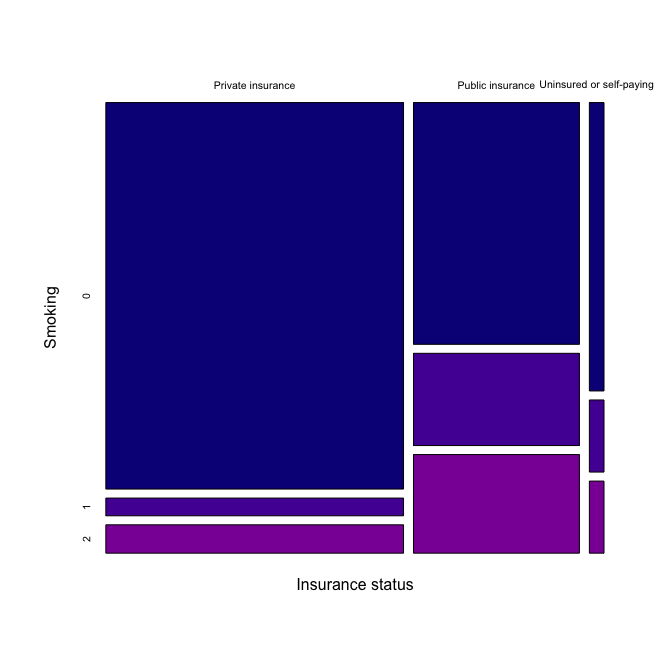


**B**

**Figure S3. Bivariate relationship between (A) socioeconomic position and insurance status and (B) smoking status during pregnancy and insurance status.**


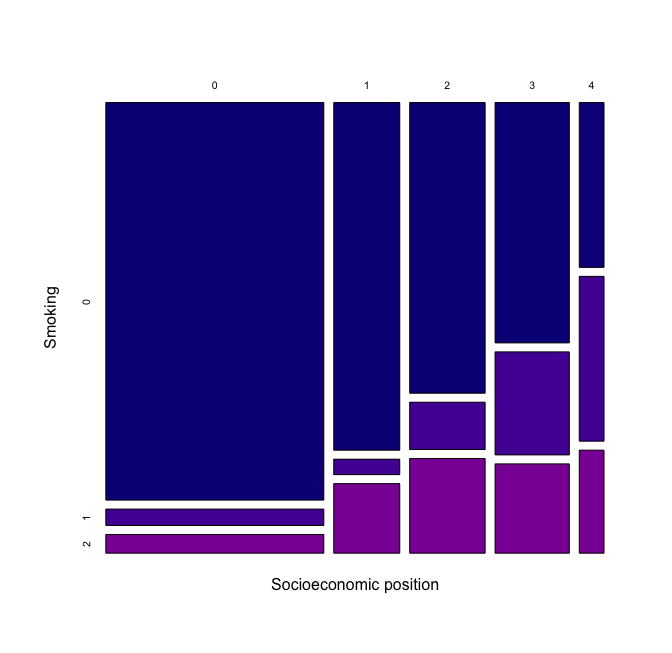

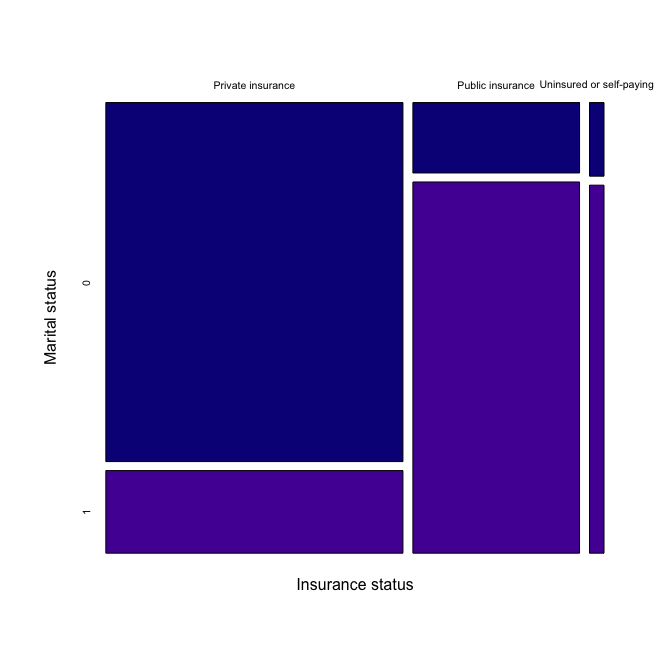


**A**

**B**

**Figure S4. Bivariate relationship between (A) marital status and insurance status and (B) smoking status during pregnancy and socioeconomic position.**


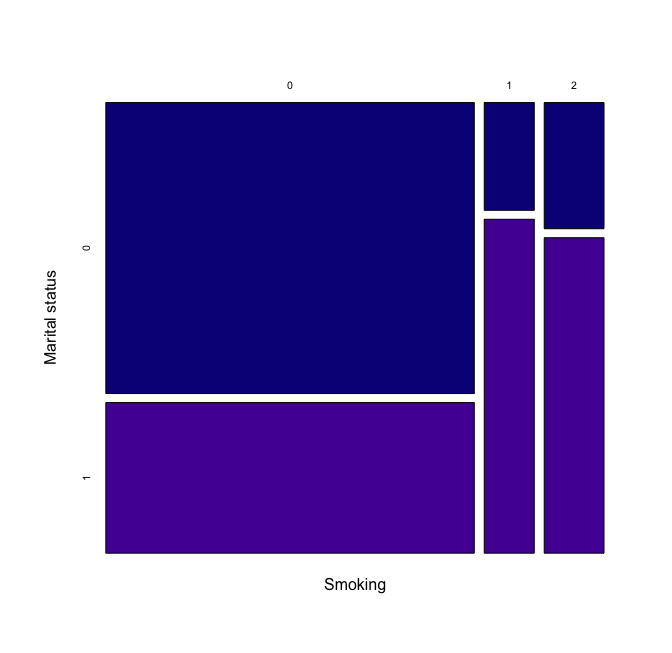


**A**


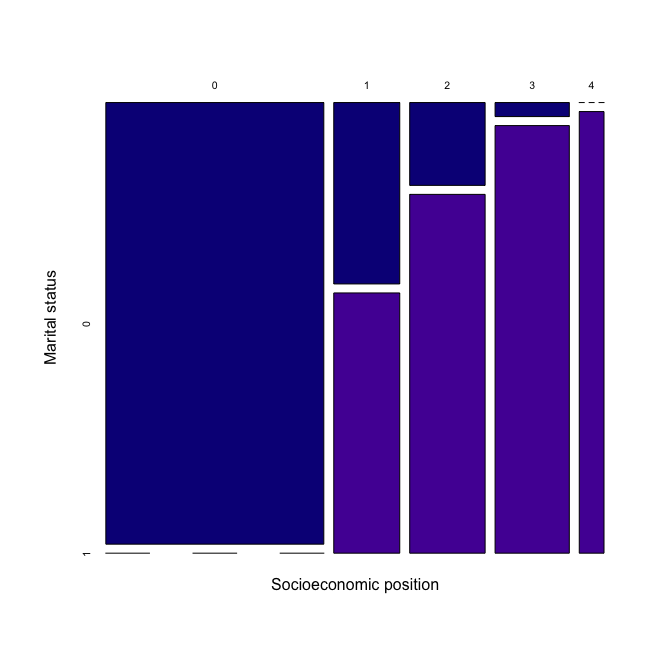


**B**

**Figure S5. Bivariate relationship between (A) marital status and smoking status during pregnancy and (B) marital status and socioeconomic position.**
